# Supplementary material for: Catalytic application of a novel melamine–naphthalene-1,3-disulfonic acid metal–organic framework in the synthesis of β-acetamido ketones
Source: Royal Society of Chemistry journal article supplement (doi:10.1039/d2nj03472g), 2022-01-01
Supplement: d2nj03472g1.pdf [file d2nj03472g1.pdf]

## **Catalytic application of a novel melamine-naphthalene-1,3-disulfonic acid metal-organic frameworks in the synthesis of $\beta$ -acetamido ketones**

Jamshid Babamoradi,<sup>a</sup> Sedigheh Alavinia,<sup>a</sup> Ramin Ghorbani-Vaghei,<sup>\*,a</sup> Reza Azadbakht<sup>b</sup>

<sup>a</sup>Department of Organic Chemistry, Faculty of Chemistry, Bu-Ali Sina University, 6517838683, Hamadan, Iran

<sup>b</sup>Department of Inorganic Chemistry, Faculty of Chemistry, Bu-Ali Sina University, 6517838683, Hamedan, Iran

\*Corresponding Author: Fax: Tel./Fax: +98-8138380709

E-mail: [rgvaghei@yahoo.com](mailto:rgvaghei@yahoo.com) & [ghorbani@basu.ac.ir](mailto:ghorbani@basu.ac.ir)

### Contents:

1. Spectra data of products.....S2-S21
2. References.....S21

## Spectral data:

*N,N'*-(1,4-Phenylenebis(3-(4-methoxyphenyl)-3-oxopropane-1,1-diyl))diacetamide: Cream solid, m.p.: 255-260 °C, <sup>1</sup>H NMR (500 MHz, DMSO-*d*<sub>6</sub>, TMS) δ 7.93 (2H, d, *J* = 8 Hz), 7.28 (2H, d, *J* = 9 Hz), 7.16 (1H, s), 7.03 (3H, d, *J* = 5.2 Hz), 5.34 (2H, s), 5.21 (NH, s), 3.87 (6H, s), 3.48 (m, 2H), 3.34 (m, 2H), 1.78 (6H, s) ppm; <sup>13</sup>C NMR (126 MHz, DMSO-*d*<sub>6</sub>, TMS) δ 196.2, 168.7, 163.8, 142.1, 131.0, 129.7, 127.0, 113.9, 68.2, 59.1, 55.8, 22.9, MS *m/z*: 516.

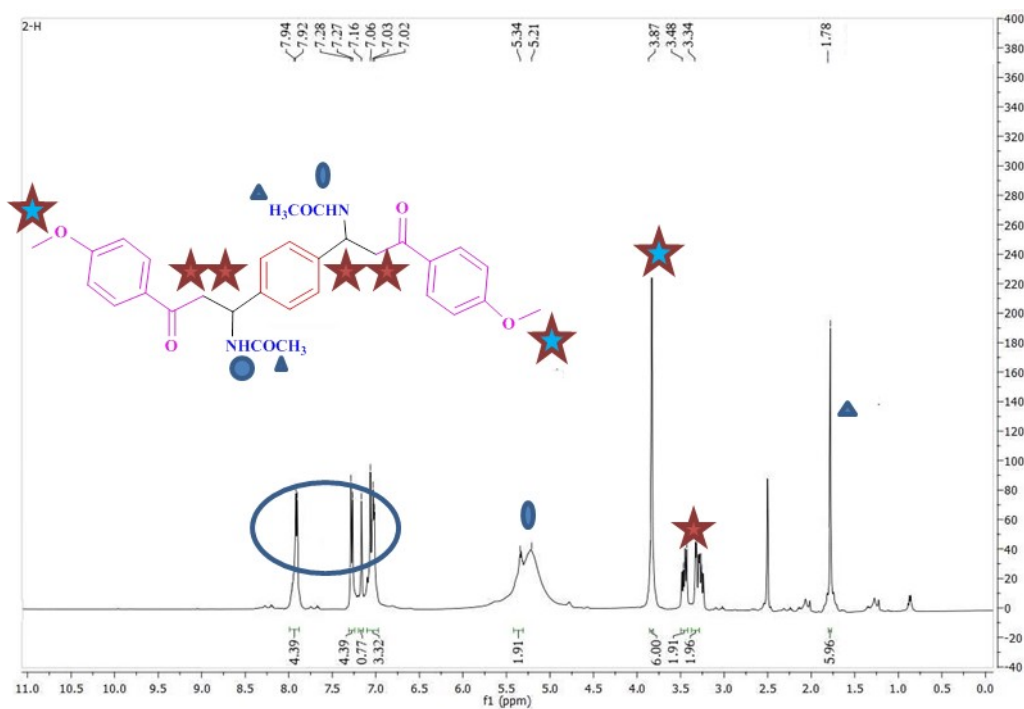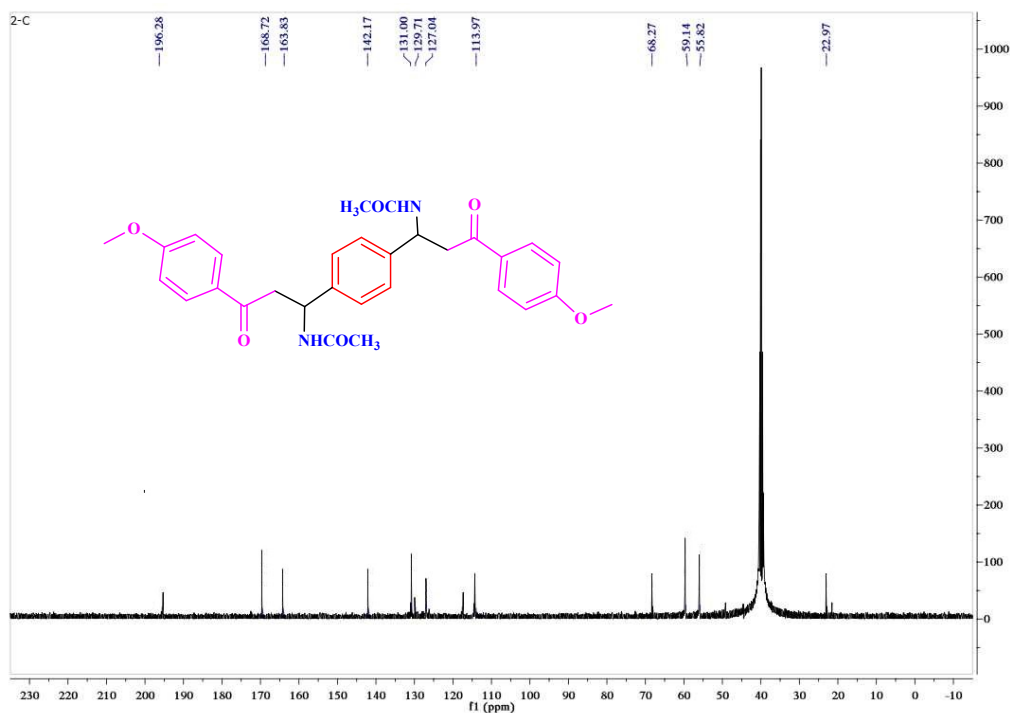

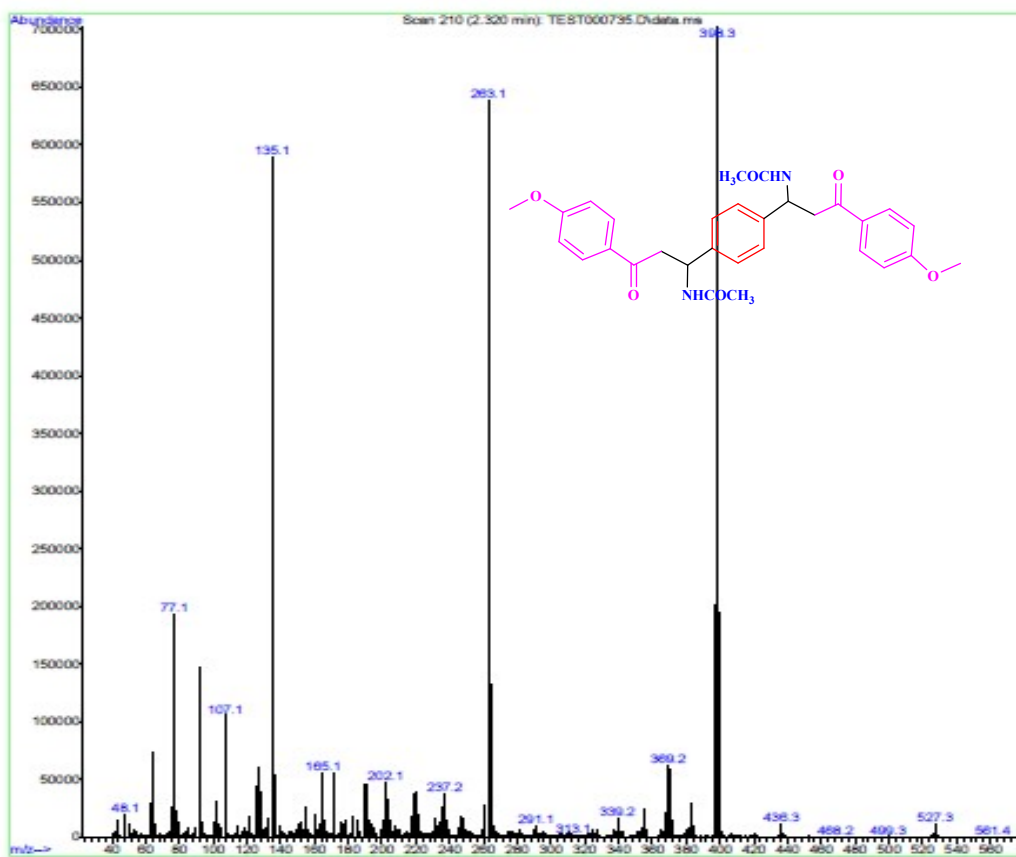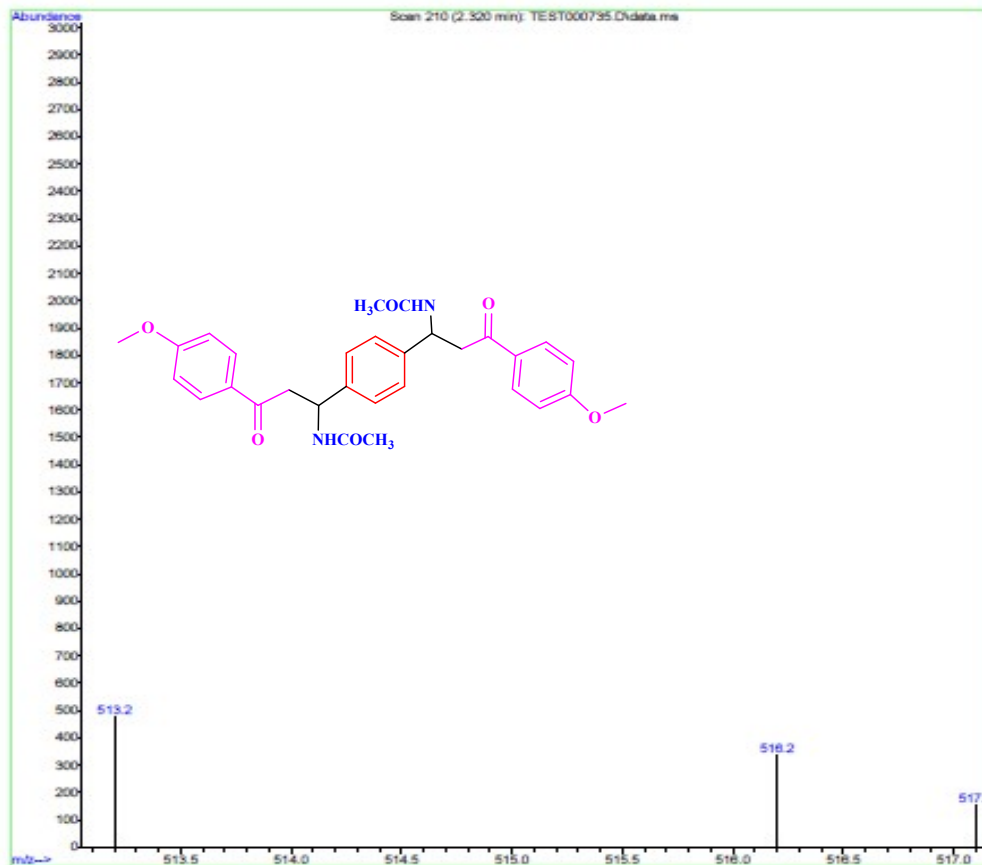

***N*-(3-Oxo-3-phenyl-1-(*p*-tolyl)propyl)acetamide:** Cream solid, m.p.: 112-114 °C [1], <sup>1</sup>H NMR (500 MHz, DMSO-*d*<sub>6</sub>, TMS) δ 7.95 (d, *J* = 7.2 Hz, 2H), 7.61 (dd, *J* = 11.0, 6.9 Hz, 2H), 7.53 (t, *J* = 7.0 Hz, 2H), 7.23 (d, *J* = 7.1 Hz, 2H), 7.11 (d, *J* = 7.1 Hz, 2H), 5.34 (d, *J* = 6.7 Hz, 1H), 3.52 (dd, *J* = 16.7, 7.6 Hz, 1H), 3.49 (dd, *J* = 16.7, 4.8 Hz, 1H), 2.26 (s, 3H), 1.79 (s, 3H) ppm; <sup>13</sup>C NMR (126 MHz, DMSO-*d*<sub>6</sub>, TMS) 198.2, 169.1, 144.7, 140.2, 136.8, 135.9, 133.2, 130.0, 129.3, 129.2, 129.1, 128.8, 128.4, 127.0, 126.1, 121.4, 71.2, 48.9, 45.3, 23.3, 21.0.

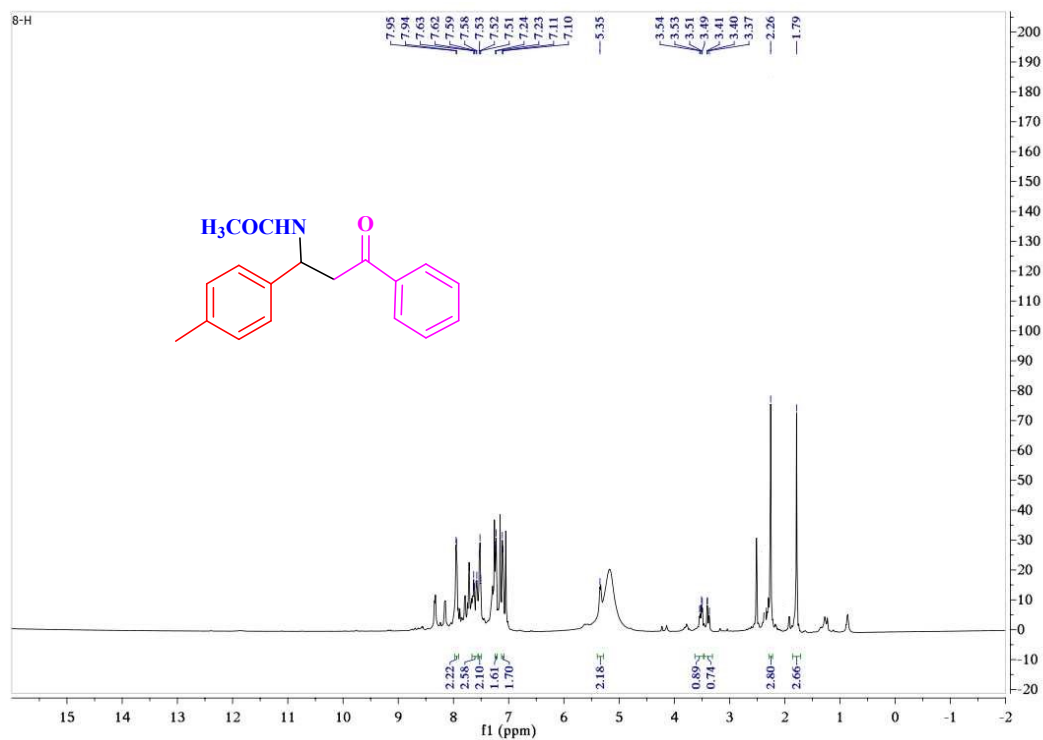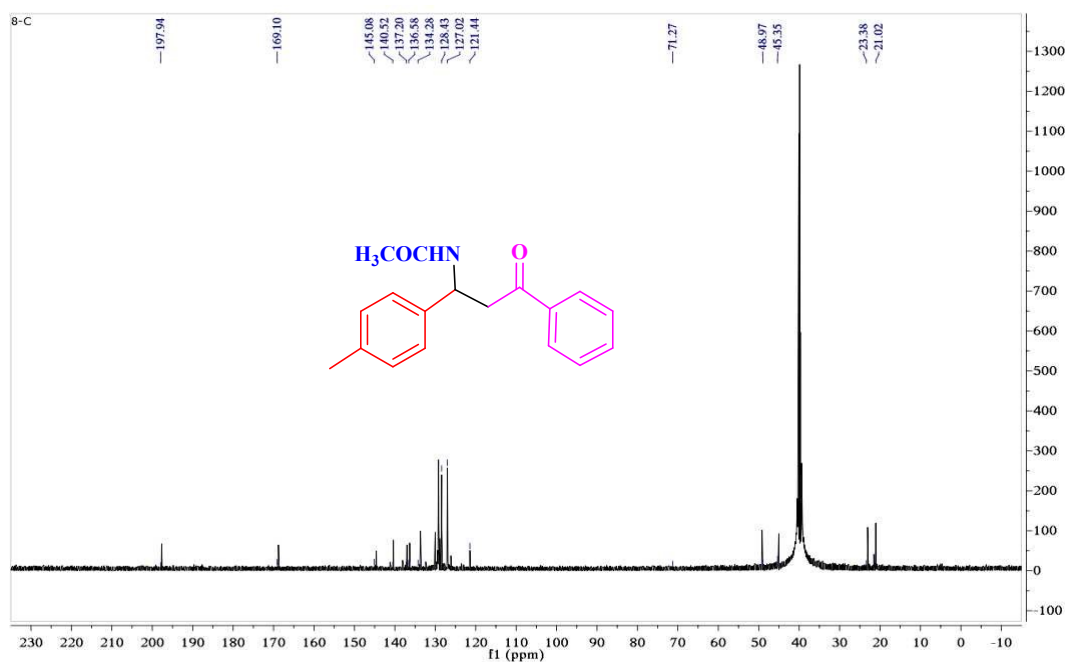

***N*-(1,3-Bis(4-nitrophenyl)-3-oxopropyl)acetamide**: Cream solid, m.p.: 152-153 °C [2], <sup>1</sup>H NMR (250 MHz, , DMSO-*d*<sub>6</sub>, TMS) δ 8.55 (d, *J* = 5.7 Hz, 1H), 8.34 –7.87 (m, 3H), 7.87-7.32 (m, 2H), 5.41 (s, 1H), 3.68 (d, *J* = 7.5 Hz, 1H), 3.52 (d, *J* = 8.3 Hz, 1H), 1.79 (s, 3H) ppm; <sup>13</sup>C NMR (63 MHz, DMSO) δ 196.3, 169.2, 152.9, 151.2, 150.8, 150.3, 146.8, 141.3, 129.9, 128.4, 124.2, 123.8, 48.8, 44.8, 22.9, MS m/z: 357.

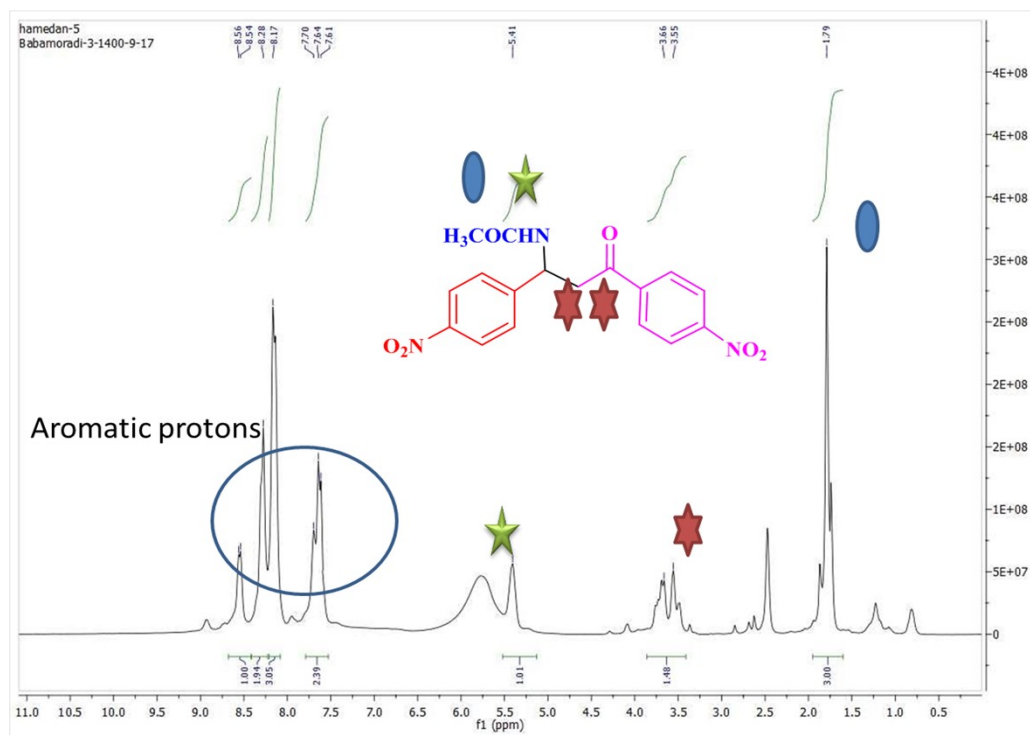

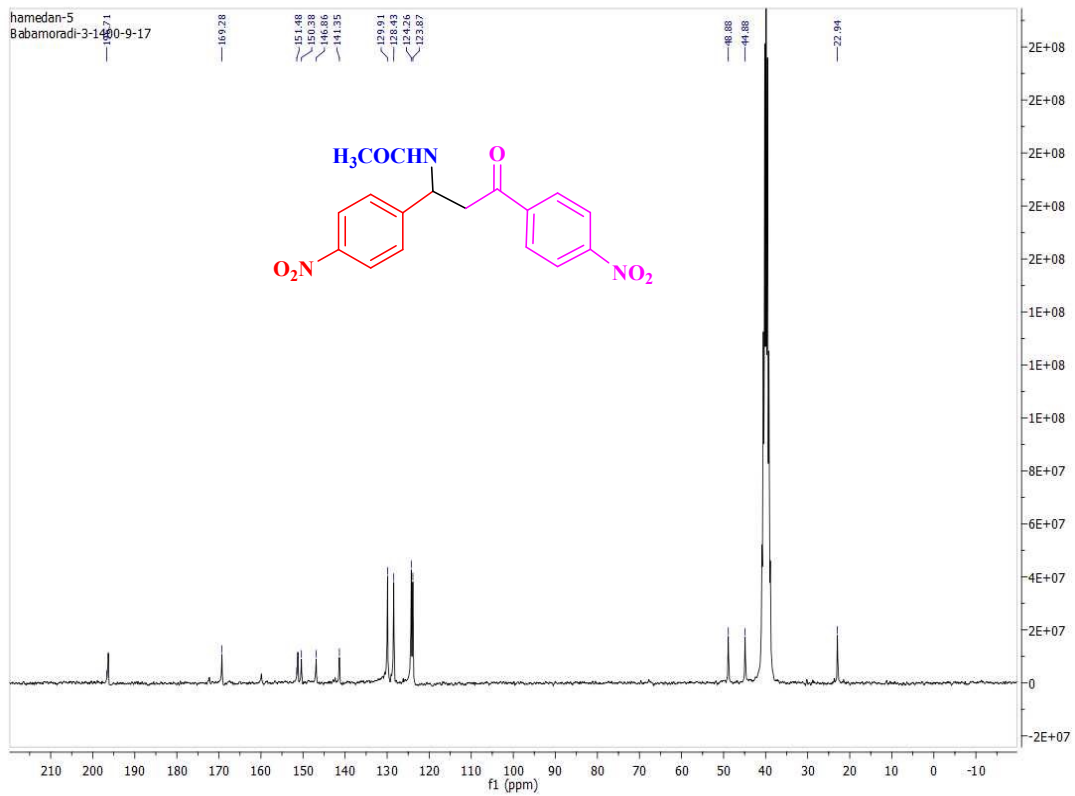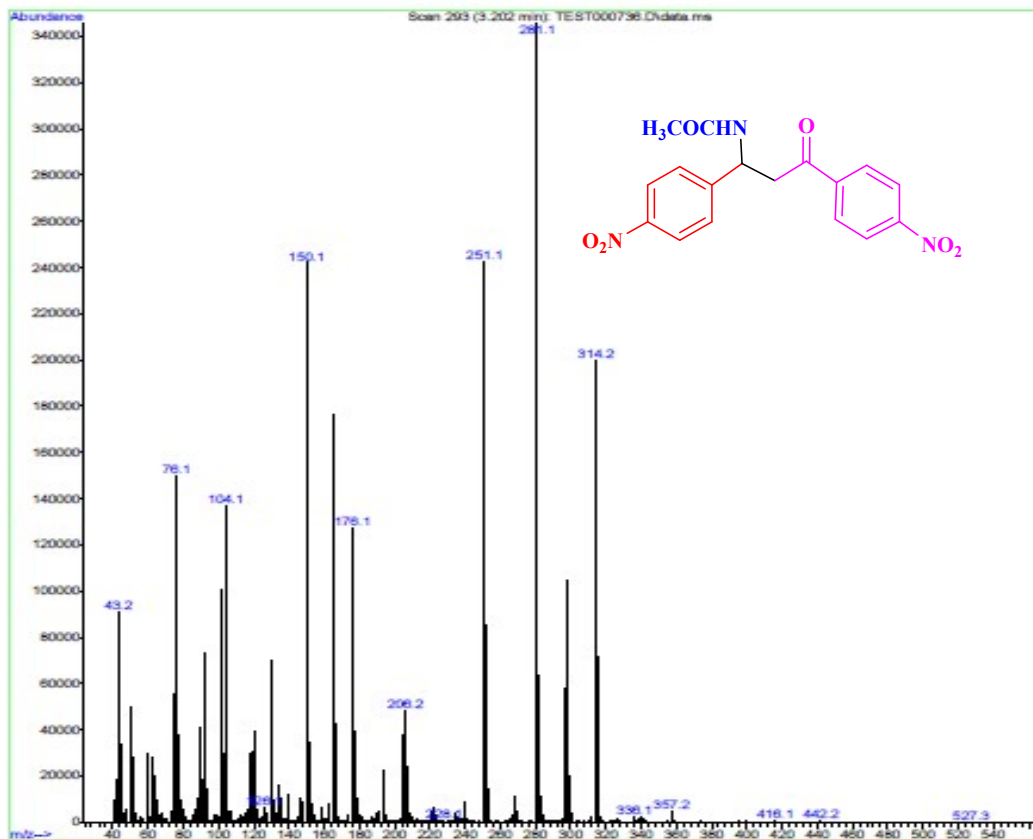

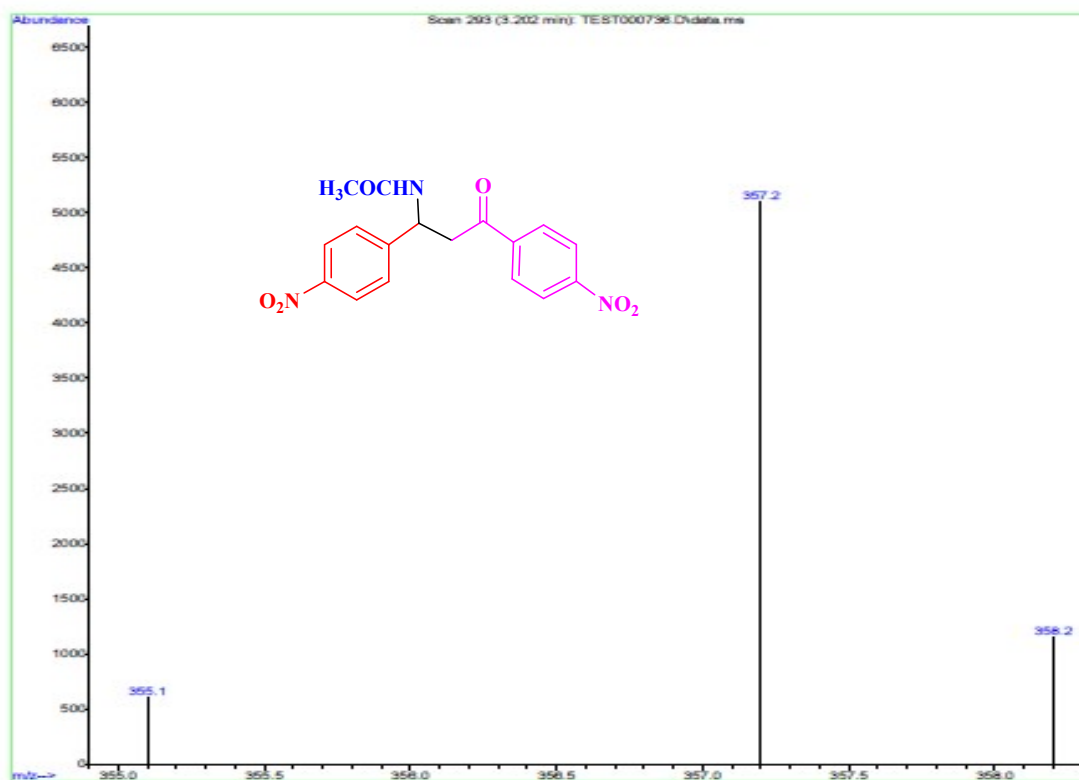

***N*-(1-(3-Hydroxyphenyl)-3-(4-nitrophenyl)-3-oxopropyl)acetamide:** Cream solid, m.p.: 179-181 °C,  $^1\text{H}$  NMR (500 MHz, DMSO-*d*<sub>6</sub>, TMS)  $\delta$  8.34 (d,  $J$  = 7.3 Hz, 2H), 8.18 (d,  $J$  = 8.3 Hz, 2H), 7.13 (dd,  $J$  = 15.3, 7.4 Hz, 1H), 6.77 (d,  $J$  = 7.3 Hz, 1H), 6.75 (s, 1H), 6.63 (d,  $J$  = 7.9 Hz, 1H), 5.28 (s, 1H), 3.57 (dd,  $J$  = 16.9, 8.6 Hz, 1H), 3.46 (dd,  $J$  = 14.4, 4.9 Hz, 1H), 1.75 (s, 3H) ppm;  $^{13}\text{C}$  NMR (126 MHz, DMSO-*d*<sub>6</sub>, TMS)  $\delta$  196.6, 169.1, 157.6, 150.3, 144.4, 141.1, 130.0, 124.4, 117.5, 114.6, 69.6, 48.9, 45.6, 22.9, MS  $m/z$ : 328.

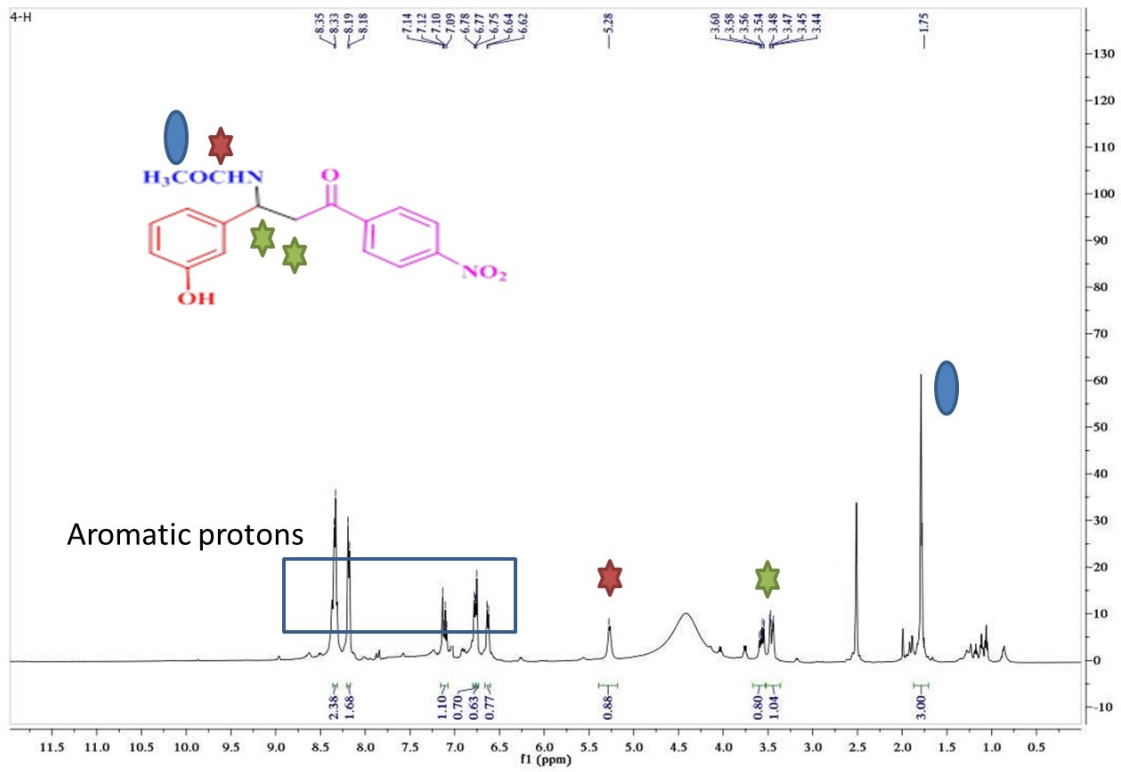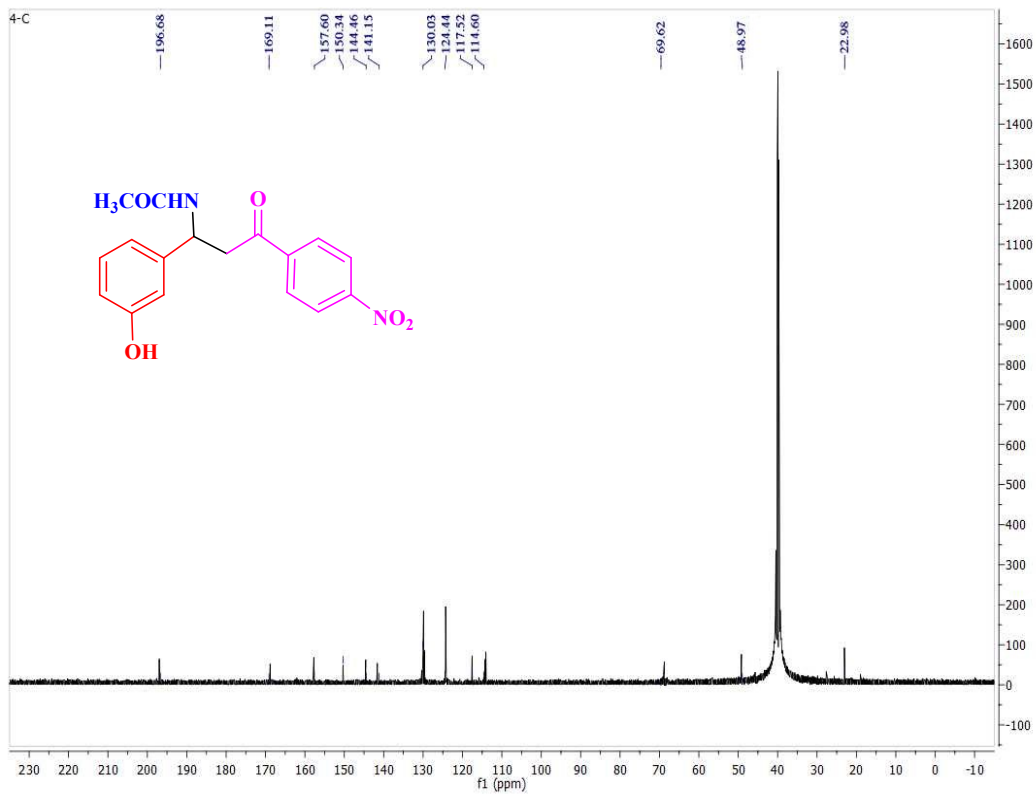



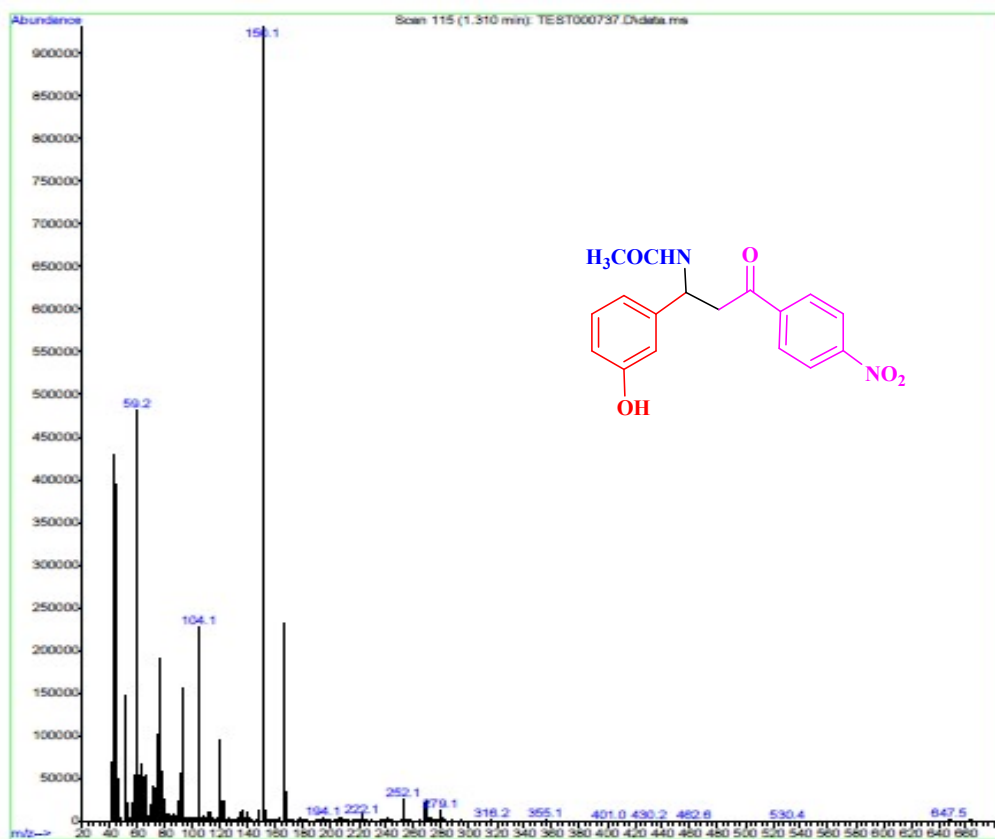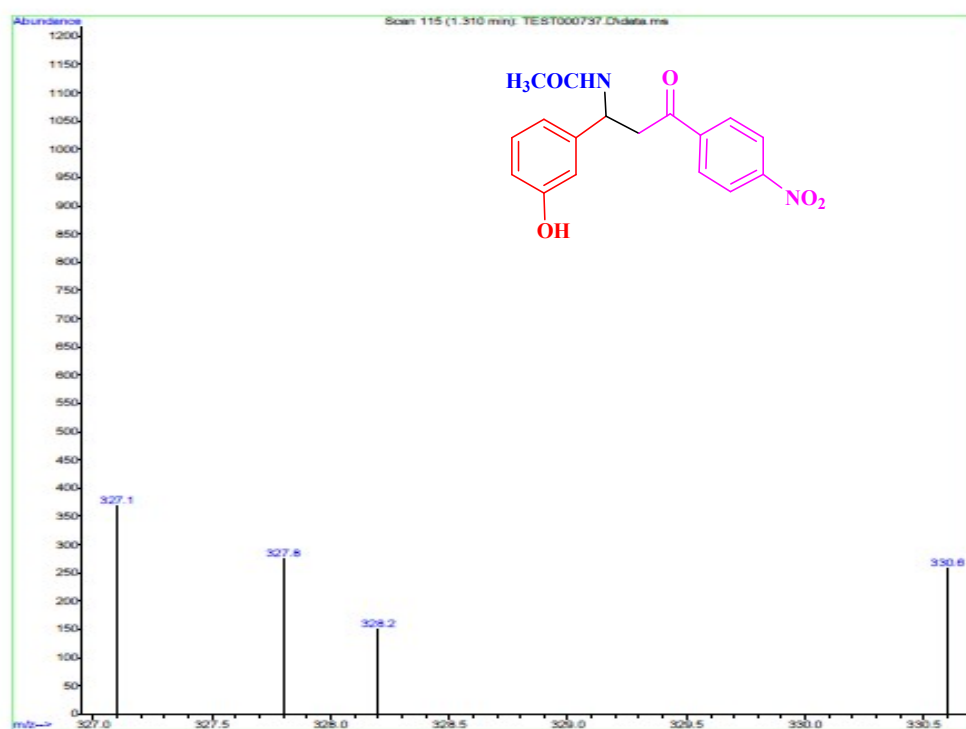

***N*-[1-(4-(Dimethylamino)phenyl)-3-(3-nitrophenyl)-3-oxopropyl]acetamide**: Cream solid, m.p.: 190-192 °C, <sup>1</sup>H NMR (500 MHz, DMSO-*d*<sub>6</sub>, TMS) δ 8.62 (s, 1H), 8.46 (d, *J* = 7.4 Hz, 1H), 8.40 (d, *J* = 6.1 Hz, 1H), 7.84 (d, *J* = 7.0 Hz, 2H), 7.75 (s, 2H), 7.69 (d, *J* = 8.3 Hz, 2H), 5.40 (s, 1H), 3.87 – 3.77 (m, 1H), 3.55 (dd, *J* = 17.5, 4.3 Hz, 1H), 3.15 (s, 6H), 1.79 (s, 3H). <sup>13</sup>C NMR (126 MHz, DMSO-*d*<sub>6</sub>, TMS) δ 195.6, 190.0, 169.4, 148.7, 138.2, 130.6, 129.0, 127.3, 126.1, 122.4, 120.8, 111.2, 72.61, 48.5, 46.3, 22.6. MS *m/z*: 355.

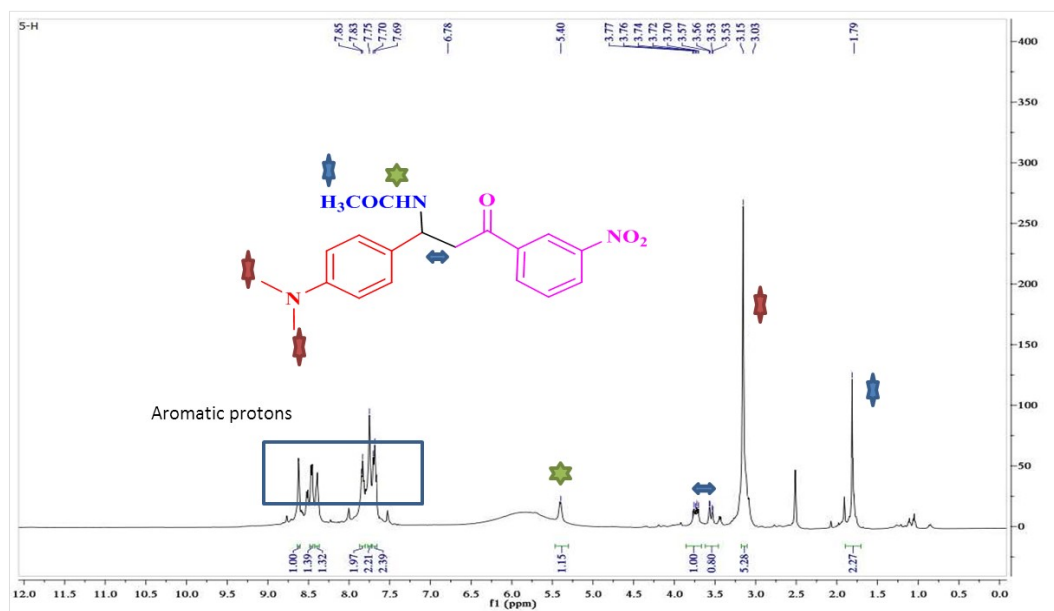

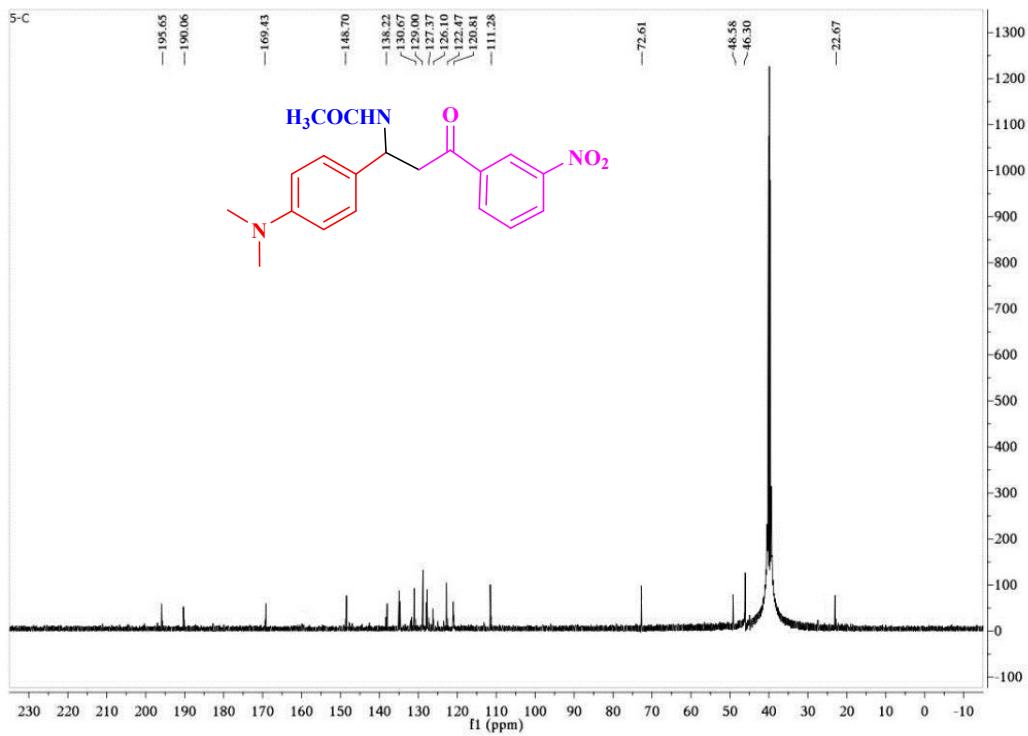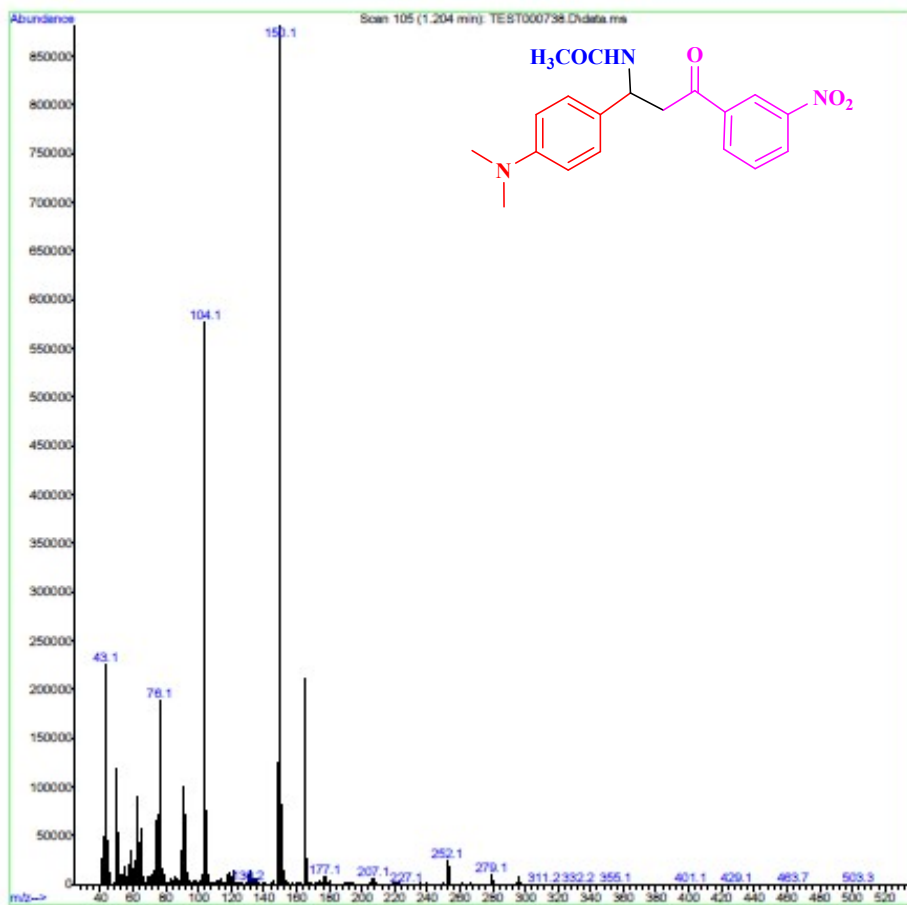

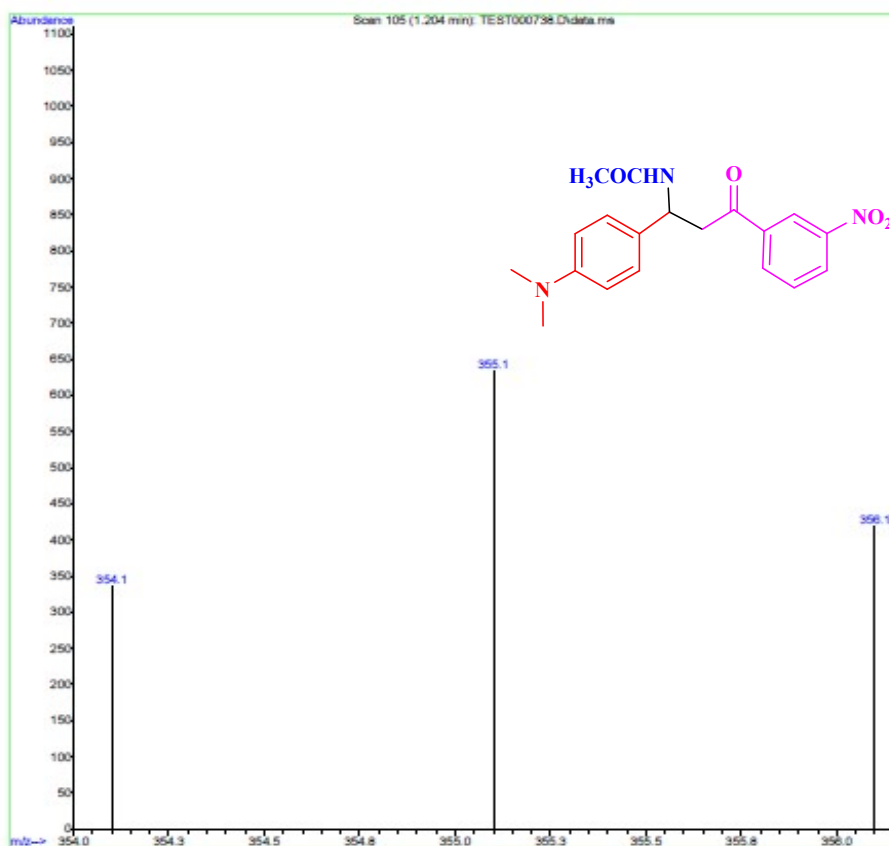

**N-(1,3-Bis(4-chlorophenyl)-3-oxopropyl)acetamide:** Cream solid, m.p.: 140-142 °C [3],  $^1\text{H}$  NMR (500 MHz, DMSO- $d_6$ , TMS)  $\delta$  8.40 (s, 1H), 7.96 (s, 3H), 7.37 (s, 3H), 7.17 (s, 1H), 7.02 (m, 1H), 6.24 (s, 1H), 3.55 (s, 1H), 3.41 (s, 1H), 1.79 (s, 3H),  $^{13}\text{C}$  NMR (126 MHz, DMSO- $d_6$ , TMS)  $\delta$  196.2, 168.7, 142.3, 138.6, 135.5, 131.7, 130.4, 129.2, 129.0, 128.6, 66.6, 48.5, 45.0, 23.3. MS m/z: 335.

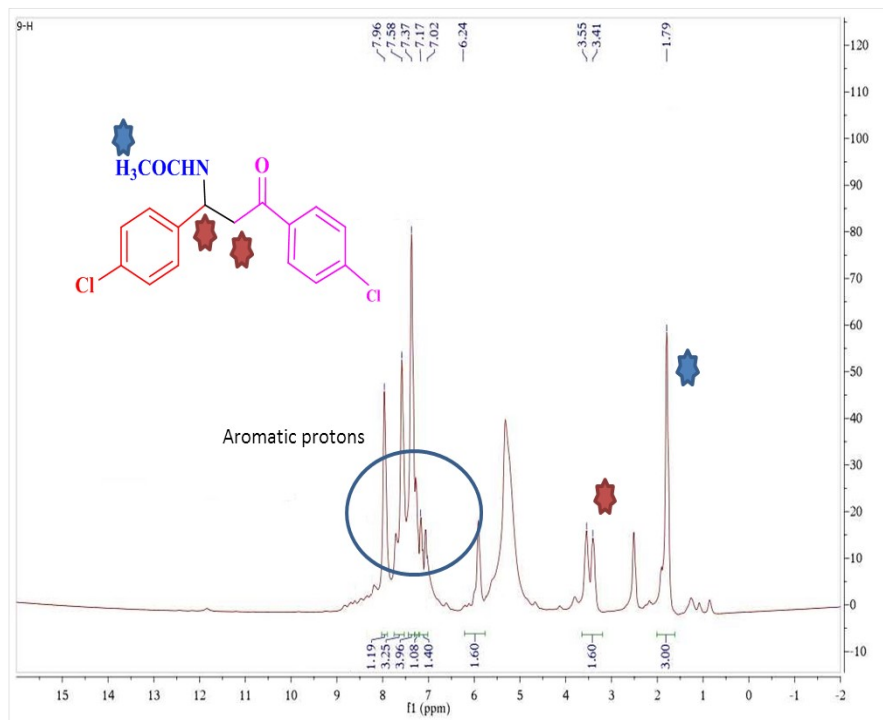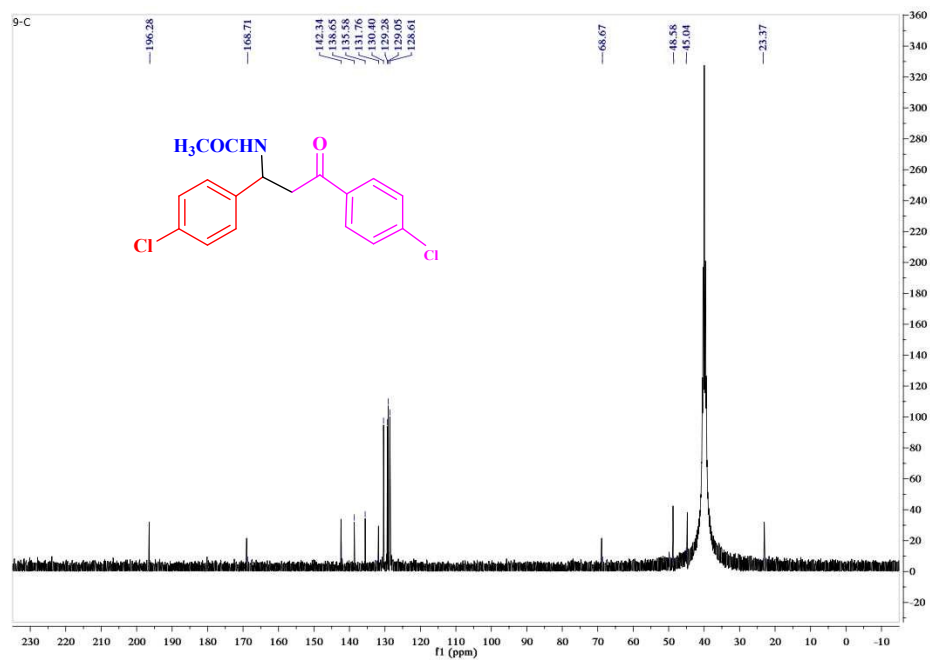

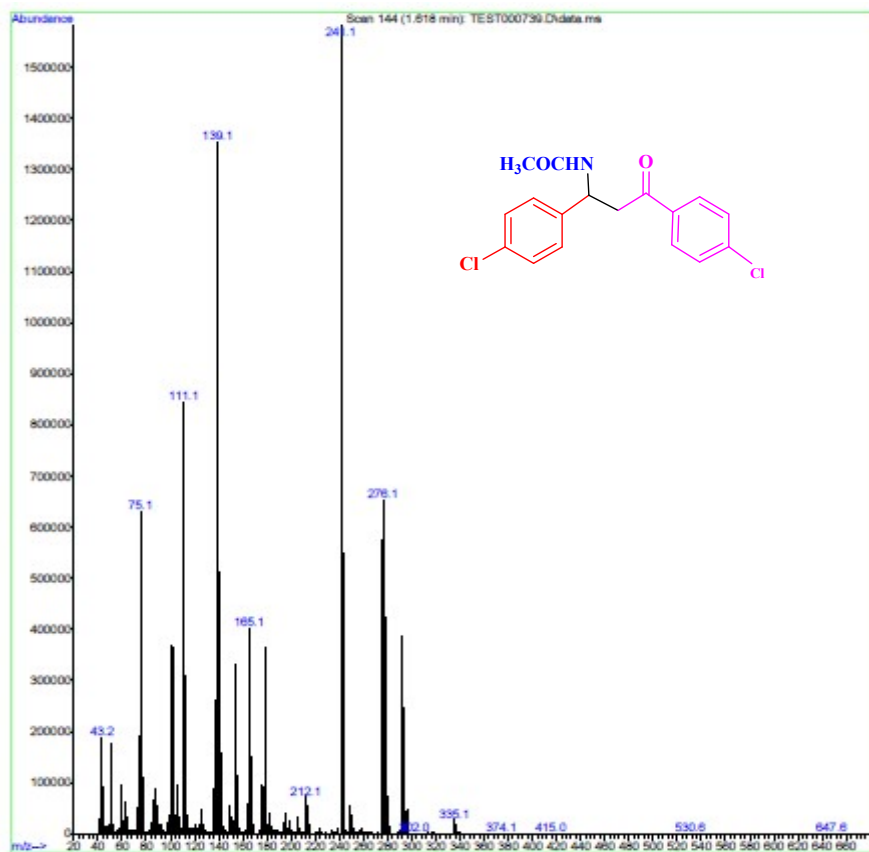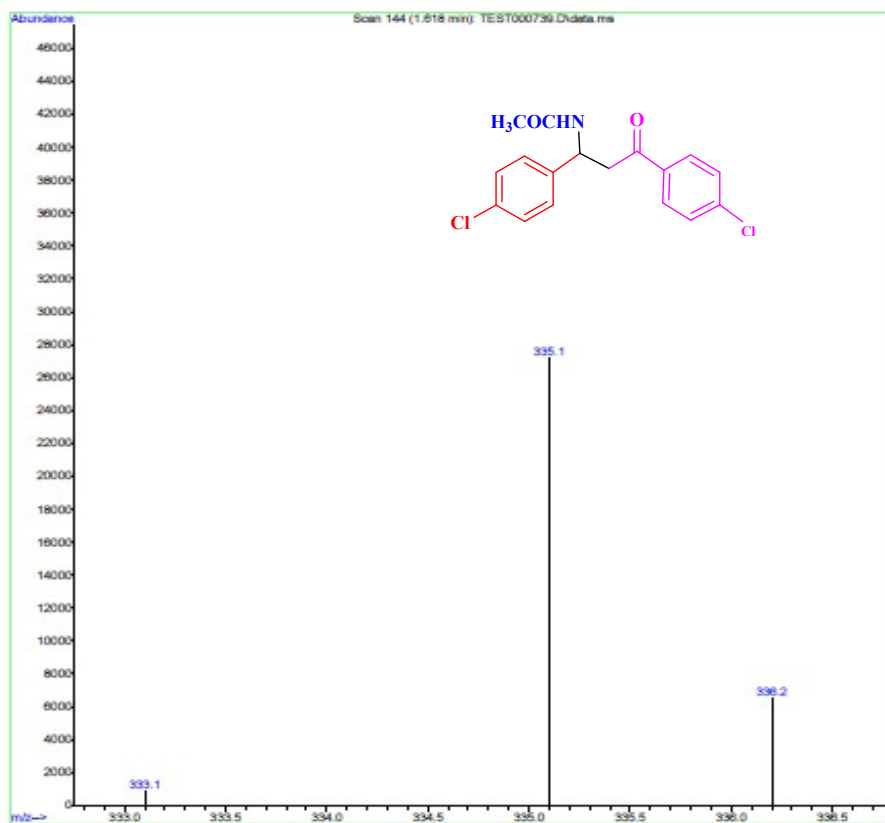

***N*-(1-(4-Chlorophenyl)-3-(4-methoxyphenyl)-3-oxopropyl)acetamide**: Cream solid, m.p.: 59-61 °C [4], <sup>1</sup>H NMR (500 MHz, DMSO-*d*<sub>6</sub>, TMS) δ 8.09 (2H, dd, *J* = 12.9, 7.9 Hz), 7.93 (2H, dd, *J* = 13.9, 6.9 Hz), 7.36 (1H, s), 7.25 (2H, s), 7.14 (1H, s), 6.95-7.10 (m, 2H), 5.25 (1H, s), 4.16 (1H, s), 3.83 (1H, s), 3.59 (3H, s), 1.79 (3H, s). <sup>13</sup>C NMR (126 MHz, DMSO-*d*<sub>6</sub>, TMS) δ 191.4, 163.2, 160.5, 146.4, 132.2, 131.6, 130.8, 130.2, 129.9, 129.0, 128.5, 113.5, 68.9, 61.4, 55.8, 22.6, MS *m/z*: 331.

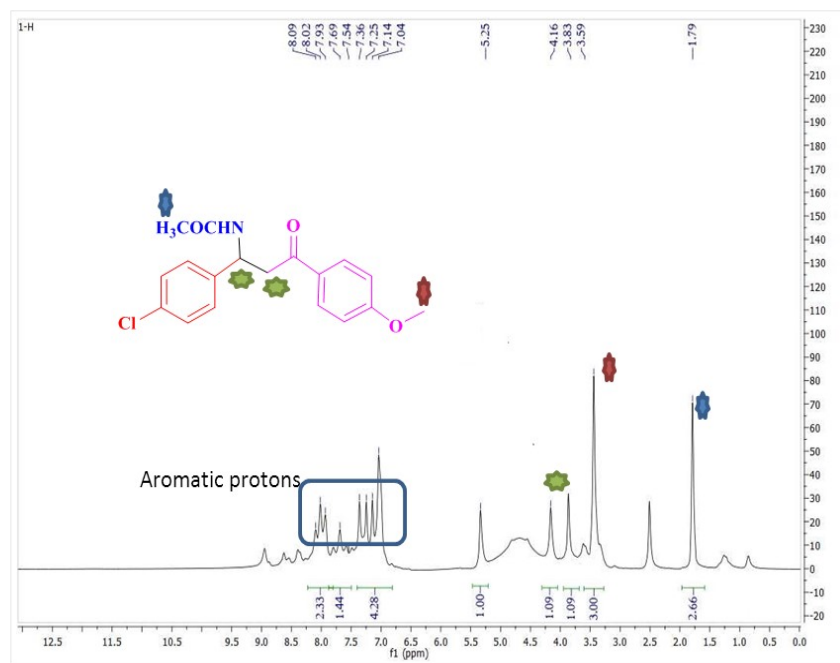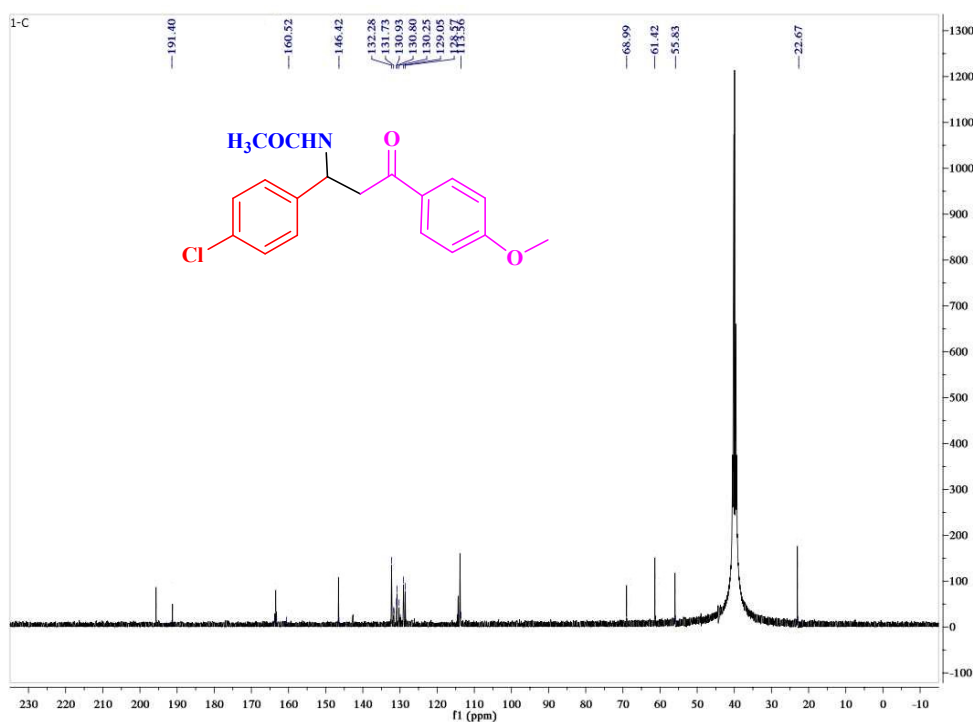

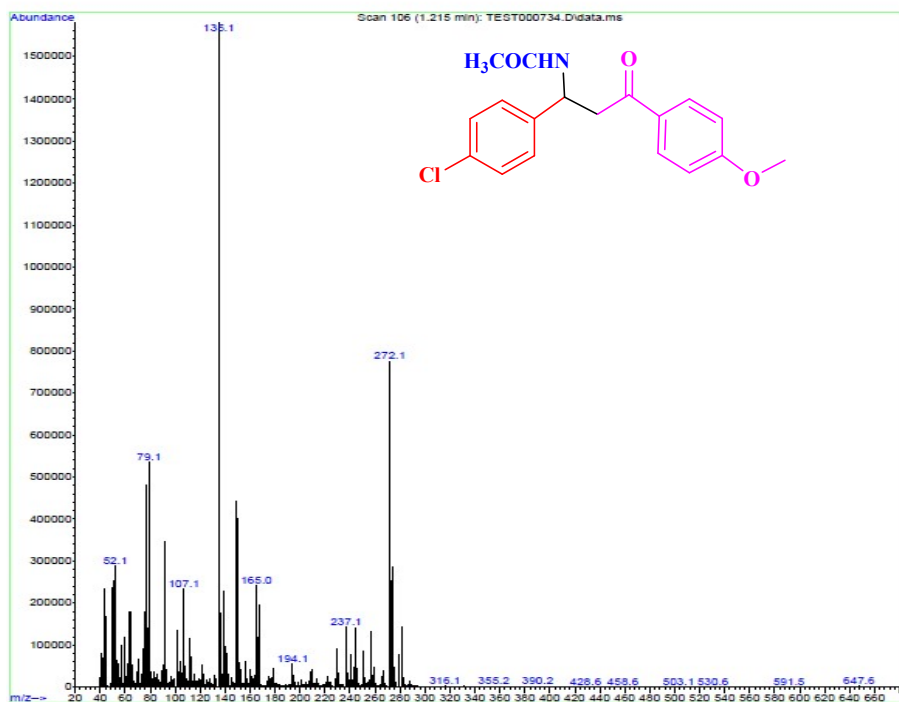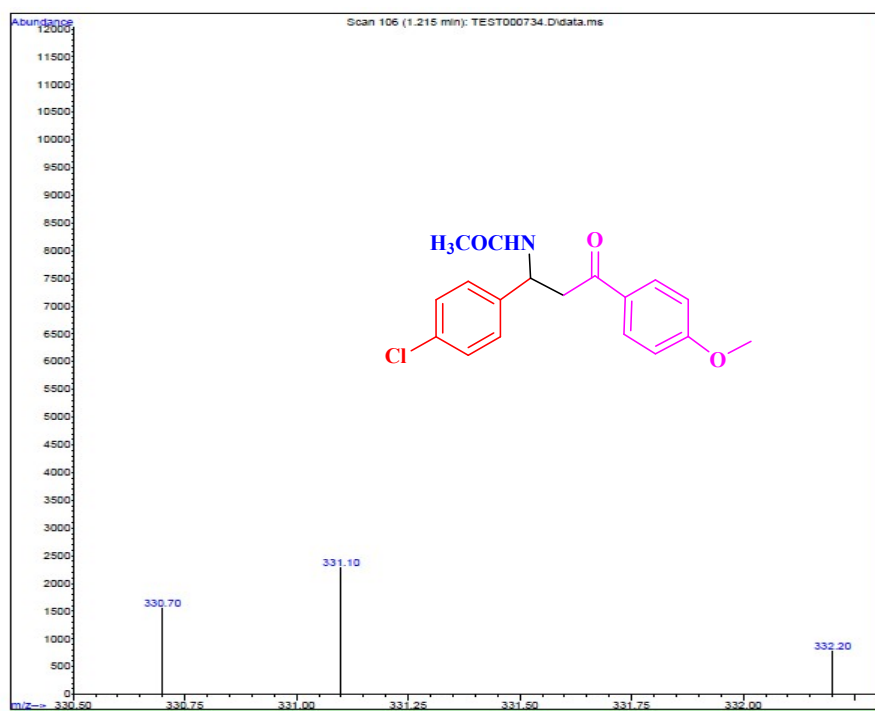



***N,N'*-(((Butane-1,4-diylbis(oxy))bis(2,1-phenylene))bis(3-(4-chlorophenyl)-3-oxopropane-1,1-diyl))diacetamide**: Cream solid, m.p.:265-267 °C, <sup>1</sup>H NMR (500 MHz, DMSO-*d*<sub>6</sub>, TMS) δ 8.23 (s, 1H), 7.98 (s, 3H), 7.56 (d, *J* = 14.4 Hz, 3H), 7.22 (d, *J* = 13.9 Hz, 2H), 7.14 (s, 2H), 7.02 (d, *J* = 18.4 Hz, 3H), 5.66 (s, 2H), 4.20 (s, 2H), 4.09 (s, 2H), 3.97 (s, 9H), 3.28 (s, 2H), 1.79 (s, 6H). <sup>13</sup>C NMR (126 MHz, DMSO-*d*<sub>6</sub>, TMS) δ 192.7, 169.7, 159.2, 153.3, 132.0, 130.3, 129.3, 125.7, 121.8, 117.2, 113.3, 68.2, 63.0, 57.4, 45.9, 26.9, 22.9, MS *m/z*: 720.

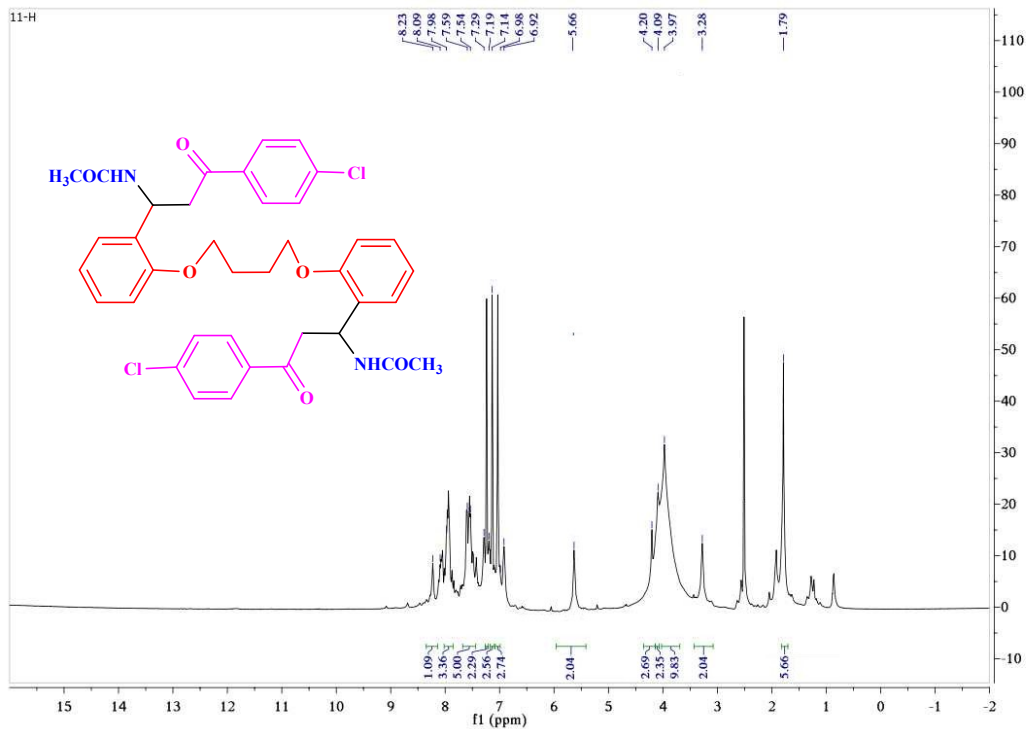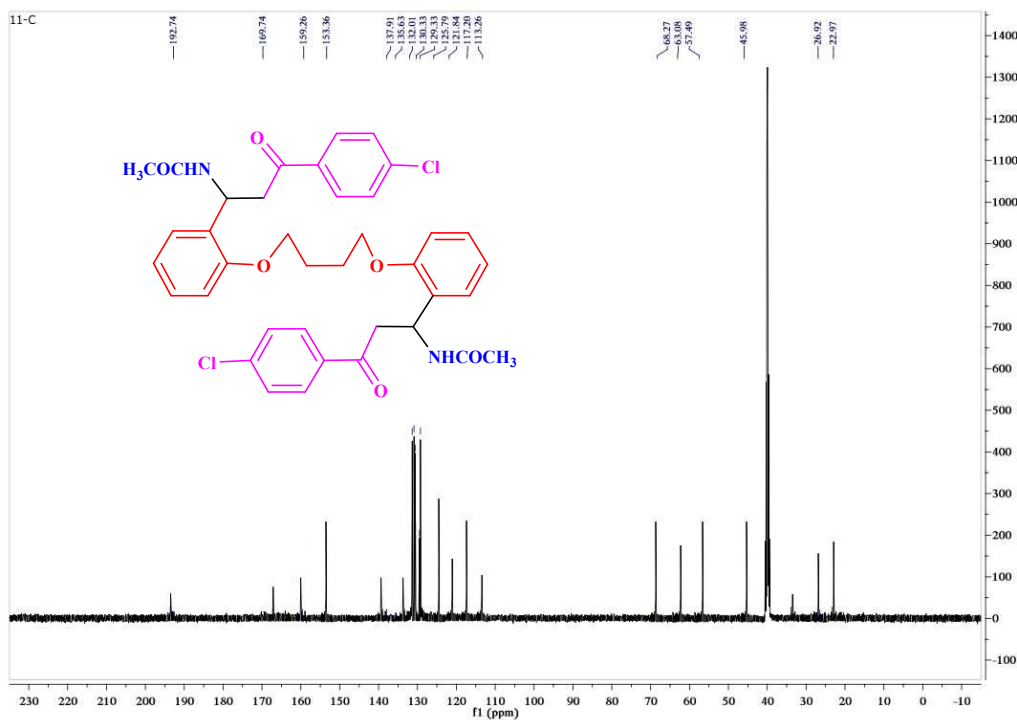

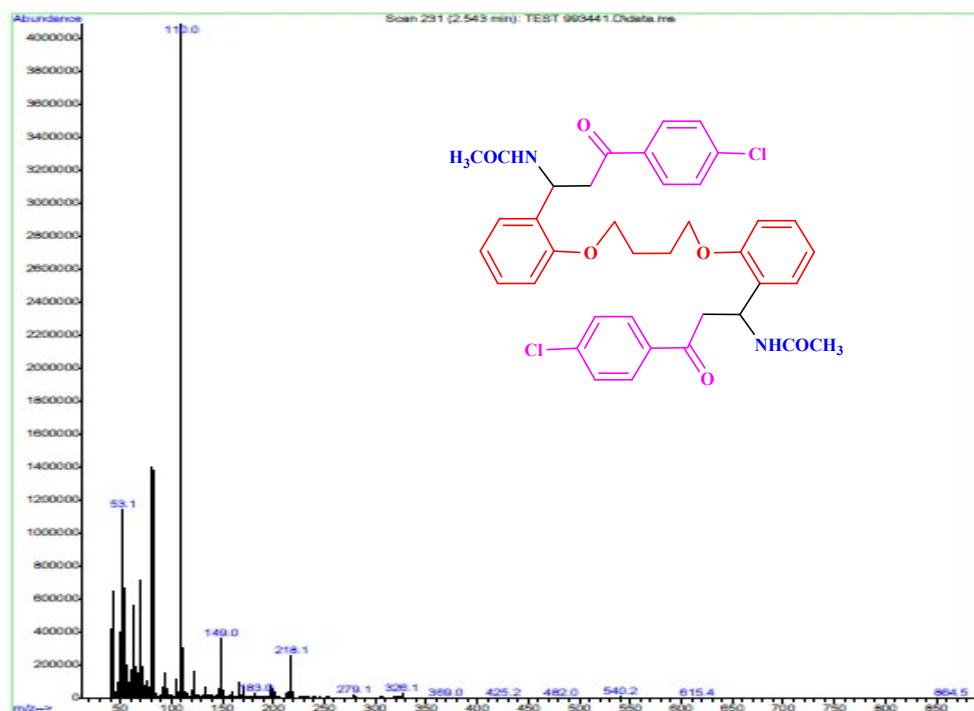

***N*-(1,3-Bis(4-chlorophenyl)-2-methyl-3-oxopropyl)acetamide:** White solid (1:1 diastereomeric mixture); mp: 267–268;  $^1\text{H}$  NMR (500 MHz,  $\text{DMSO-}d_6$ , TMS)  $\delta$  8.40 (dd,  $J = 16.0, 8.9$  Hz, 2H), 8.05 (d,  $J = 7.9$  Hz, 3H), 7.84 (d,  $J = 7.9$  Hz, 2H), 7.71 (s, 1H), 7.62 (d,  $J = 7.9$  Hz, 2H), 7.55 (d,  $J = 7.8$  Hz, 2H), 7.39 (s, 4H), 7.31 (dd,  $J = 19.4, 7.9$  Hz, 3H), 7.24 (s, 1H), 7.14 (s, 1H), 7.04 (s, 1H), 5.15 (dt,  $J = 64.4, 8.8$  Hz, 2H), 4.21 – 3.81 (m, 2H), 1.85 (s, 3H), 1.67 (s, 3H), 1.11 (s, 3H), 0.83 (s, 3H).  $^{13}\text{C}$  NMR (126 MHz,  $\text{DMSO-}d_6$ , TMS)  $\delta$  201.2, 169.4, 168.7, 138.7, 135.1, 132.3 – 132.1, 131.9, 130.7, 130.3, 129.9, 129.6, 128.8, 128.5, 54.8, 53.8, 45.3, 44.3, 23.0, 22.6, 16.1, 14.8, MS  $m/z$ : 349.

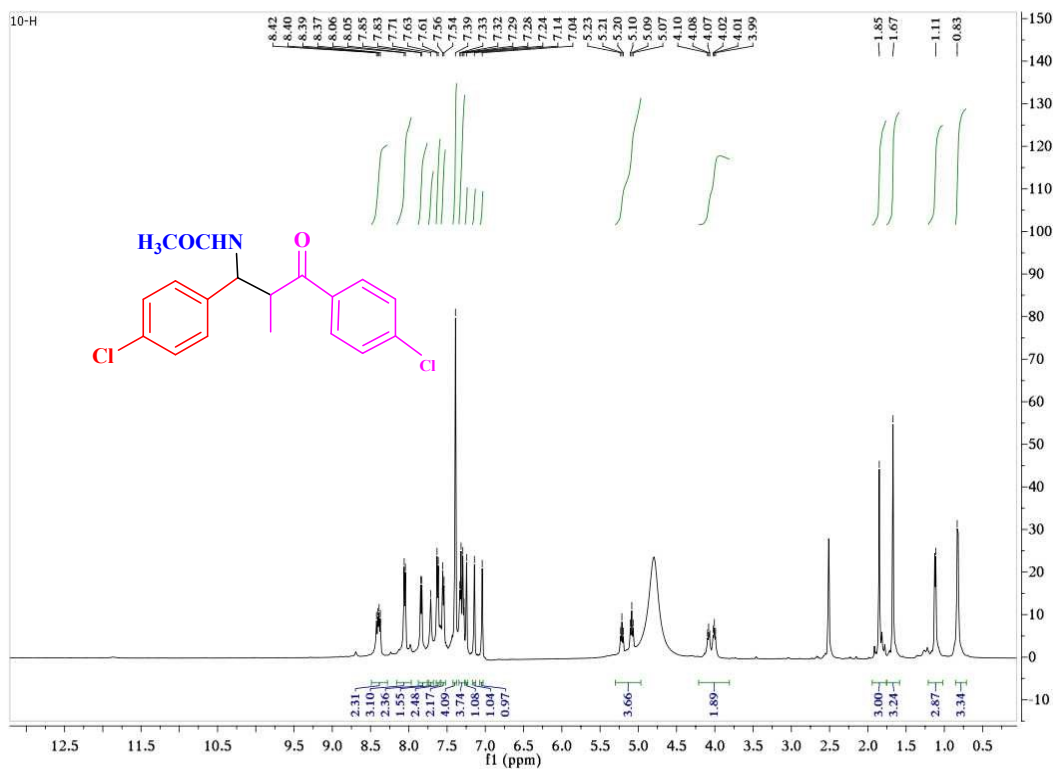

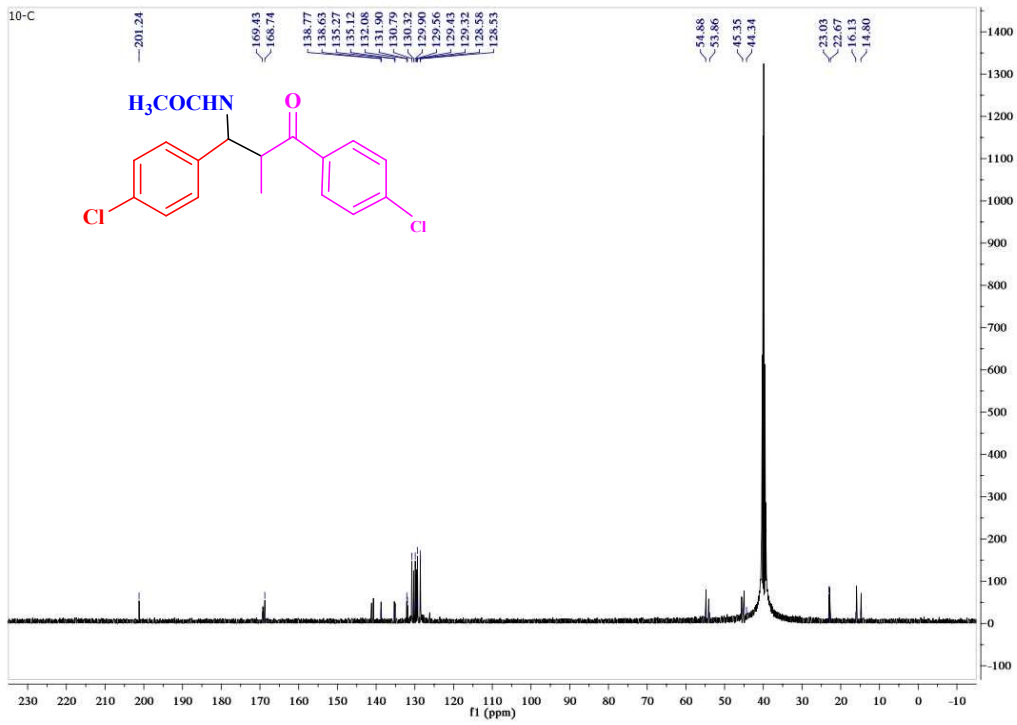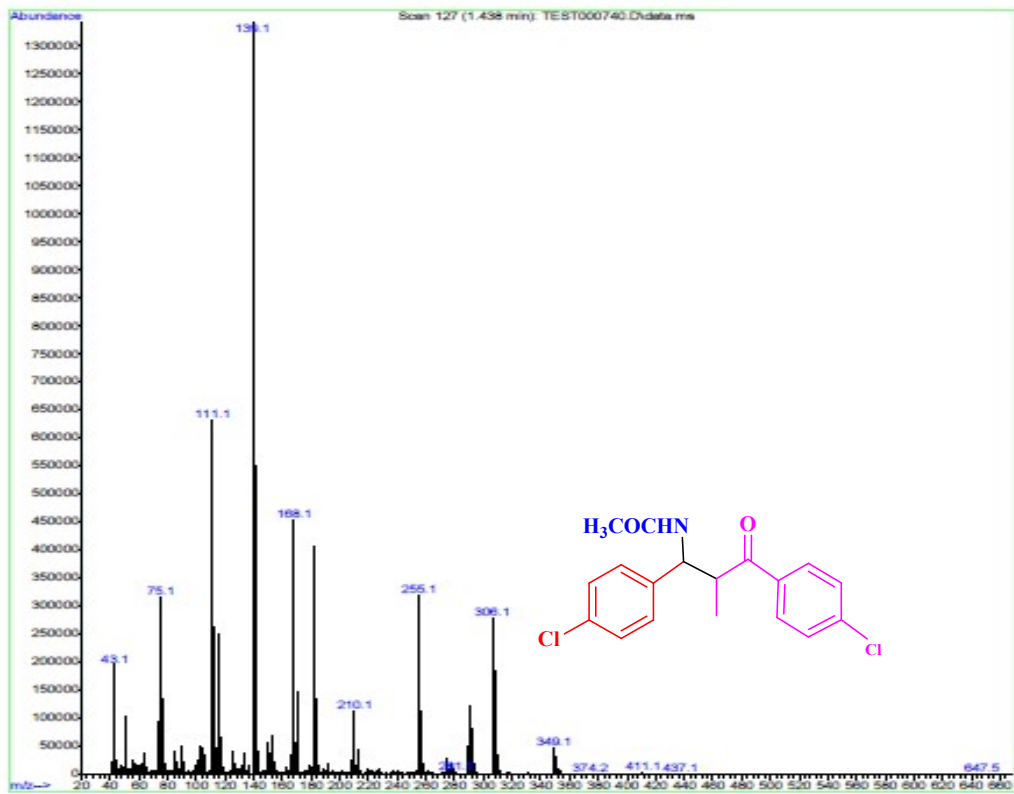

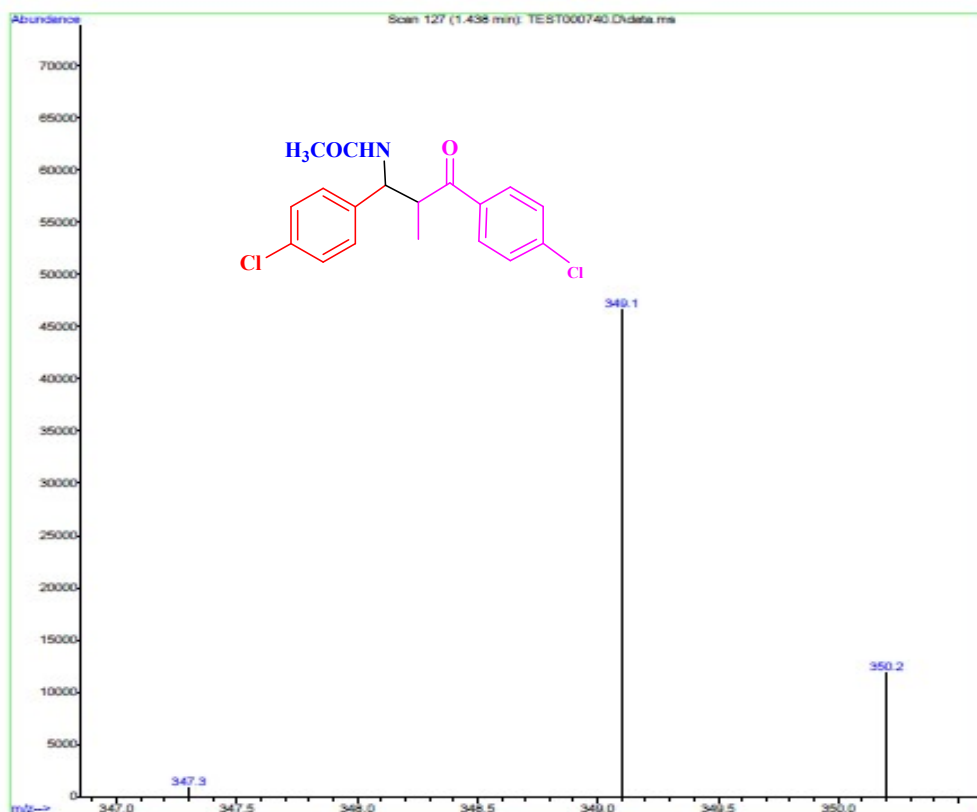

***N*-(3-Oxo-1,3-diphenylpropyl)acetamide:** White solid, m.p. 103-105°C [1];  $^1\text{H}$  NMR (500 MHz, DMSO-*d*<sub>6</sub>, TMS)  $\delta$  8.32 (d, 1H,  $J$  = 8.0 Hz), 7.96 (d, 1H,  $J$  = 8.1 Hz), 7.66 (t, 2H,  $J$  = 7.8 Hz), 7.53 (t, 2H,  $J$  = 8.1 Hz), 7.34-7.25 (m, 4H), 7.23 (t, 1H,  $J$  = 7.4 Hz), 6.93 (br, 1H), 5.54 (m, 1H), 3.70 (dd, 1H,  $J$  = 16.8, 5.2 Hz), 3.41 (dd, 1H,  $J$  = 16.8, 6.0 Hz), 1.96 (s, 3H),  $^{13}\text{C}$  NMR (126 MHz, DMSO-*d*<sub>6</sub>, TMS)  $\delta$  197.5, 169.0, 143.5, 136.5, 133.6, 129.1, 128.7, 128.4, 127.3, 127.0, 49.3, 44.5, 23.3.

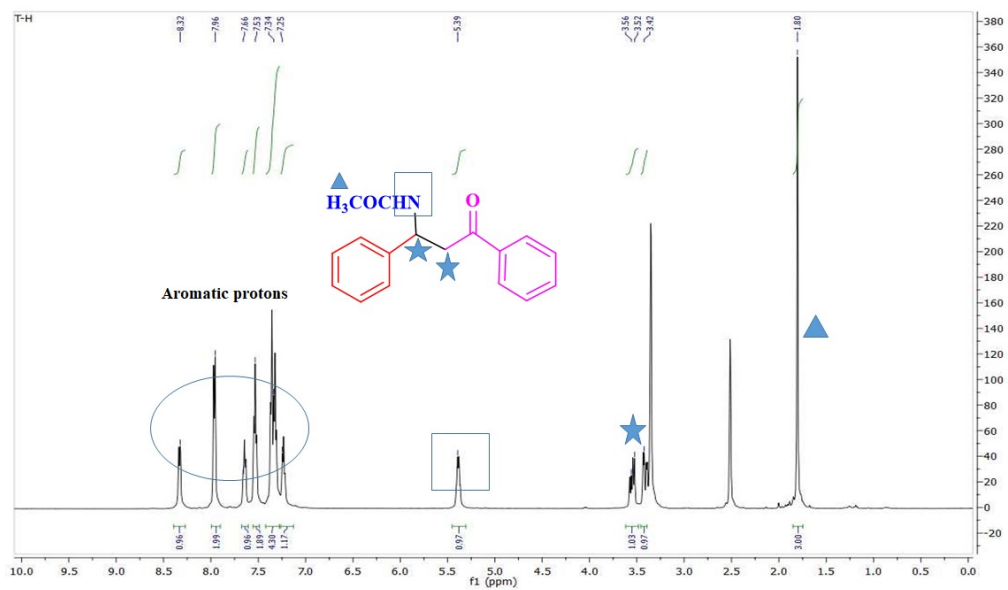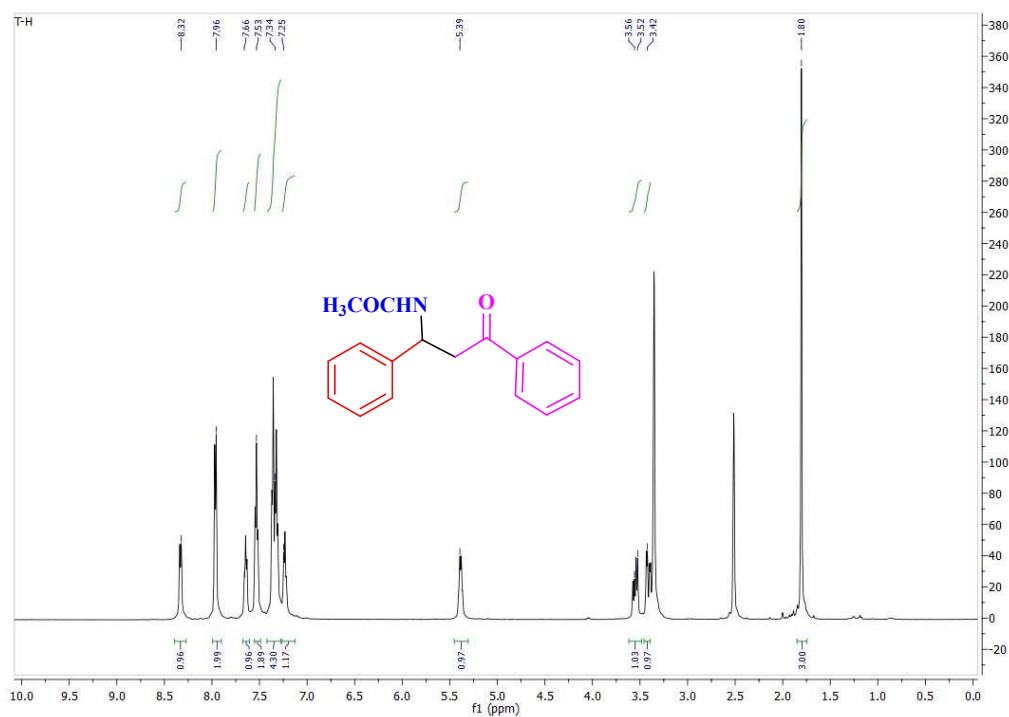

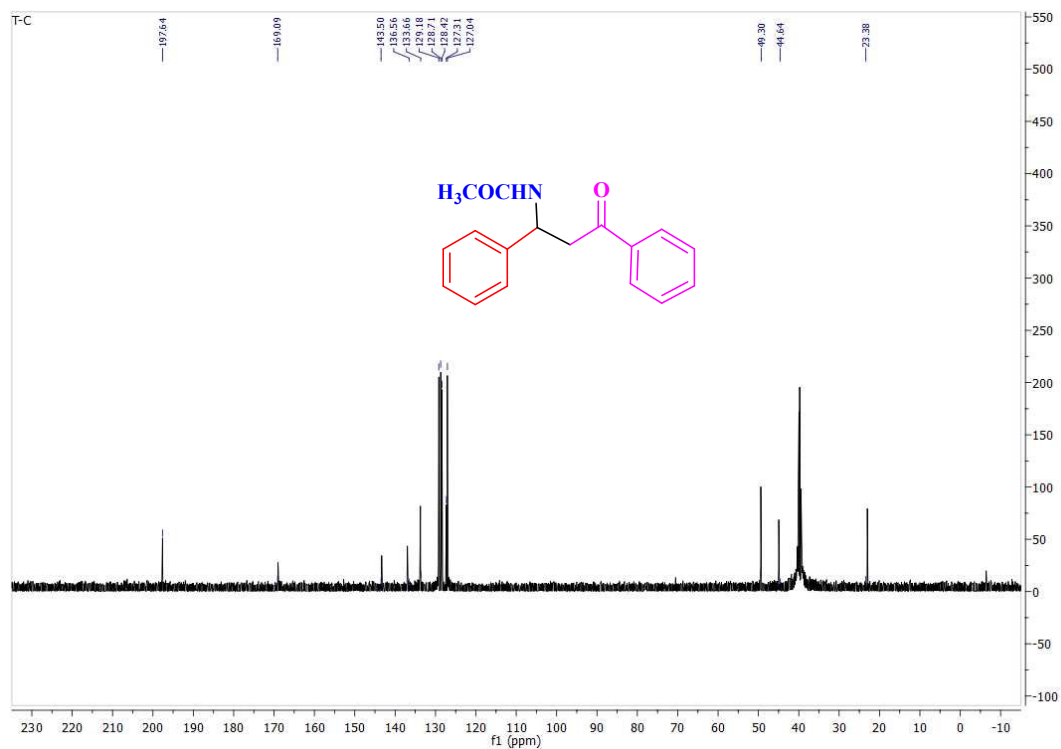

***N,N'*-(((2-Hydroxypropane-1,3-diyl)bis(oxy))bis(2,1-phenylene))bis(3-(4-methoxyphenyl)-3-oxopropane-1,1-diyl)diacetamide:** Cream solid, m.p.:>300 °C, <sup>1</sup>H NMR (500 MHz, DMSO-d<sub>6</sub>, TMS) δ:8.40 (s, 2H), 8.22 (s, 1H), 7.88 (m, 2H), 7.69 (s, 1H), 7.24 (m, 2H), 7.14 (m, 2H), 7.04 (s, 1H), 6.97 (m, 6H), 4.13-4.48 (m, 3H), 3.90 (s, 1H), 3.80 (broad, 6H), 1.80 (s, 7H) ppm; 198.6, 172.3, 163.5, 151.2, 141.3, 137.7, 132.0, 131.3, 128.3, 126.1, 121.8, 119.4, 116.2, 114.5, 68.2, 62.7, 56.1, 46.6, 21.4, 19.4, MS m/z: 682.

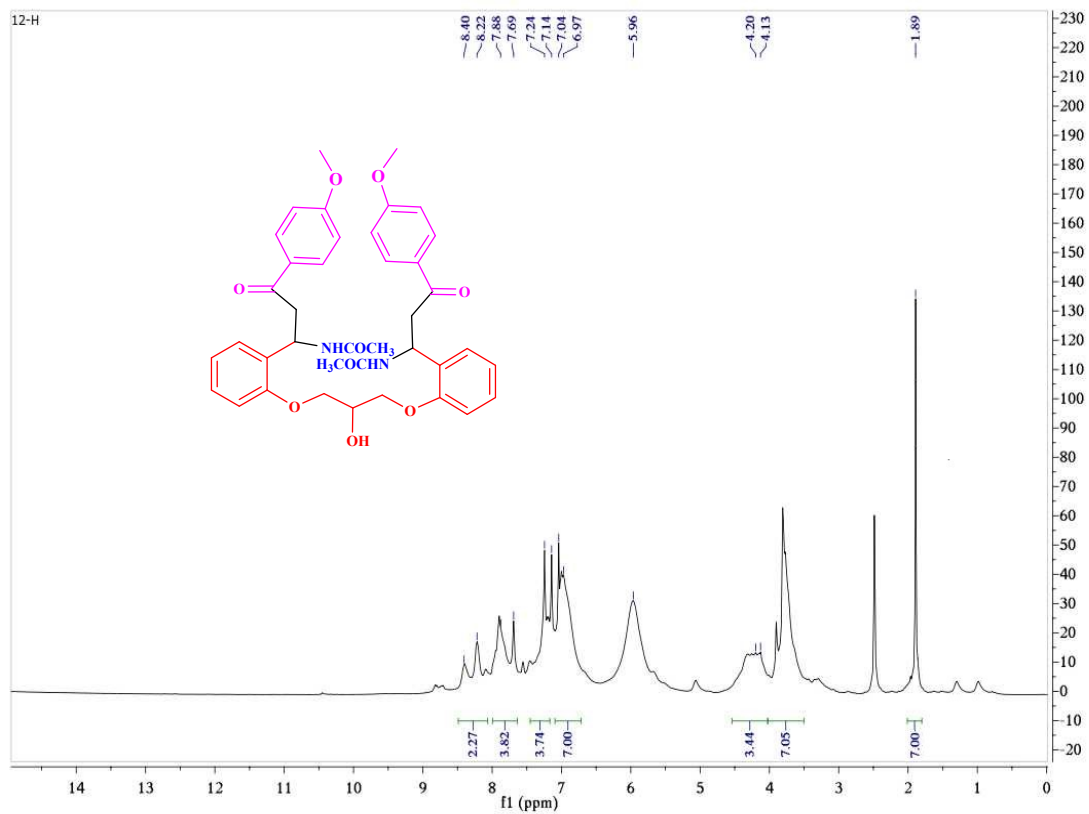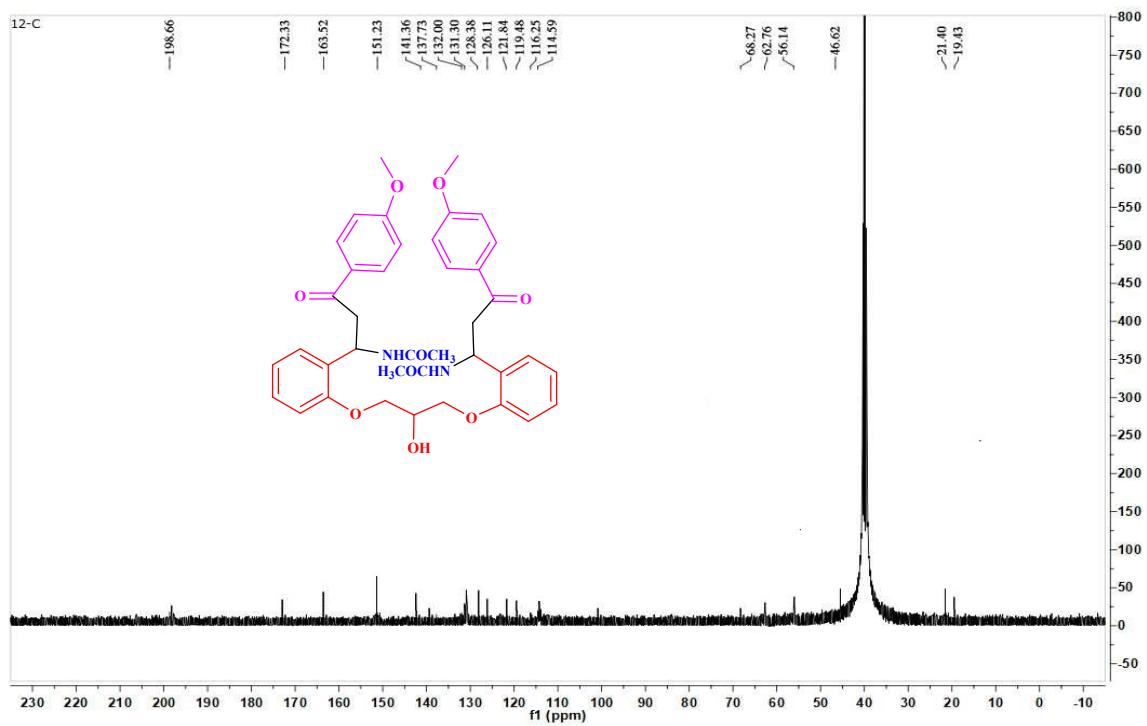

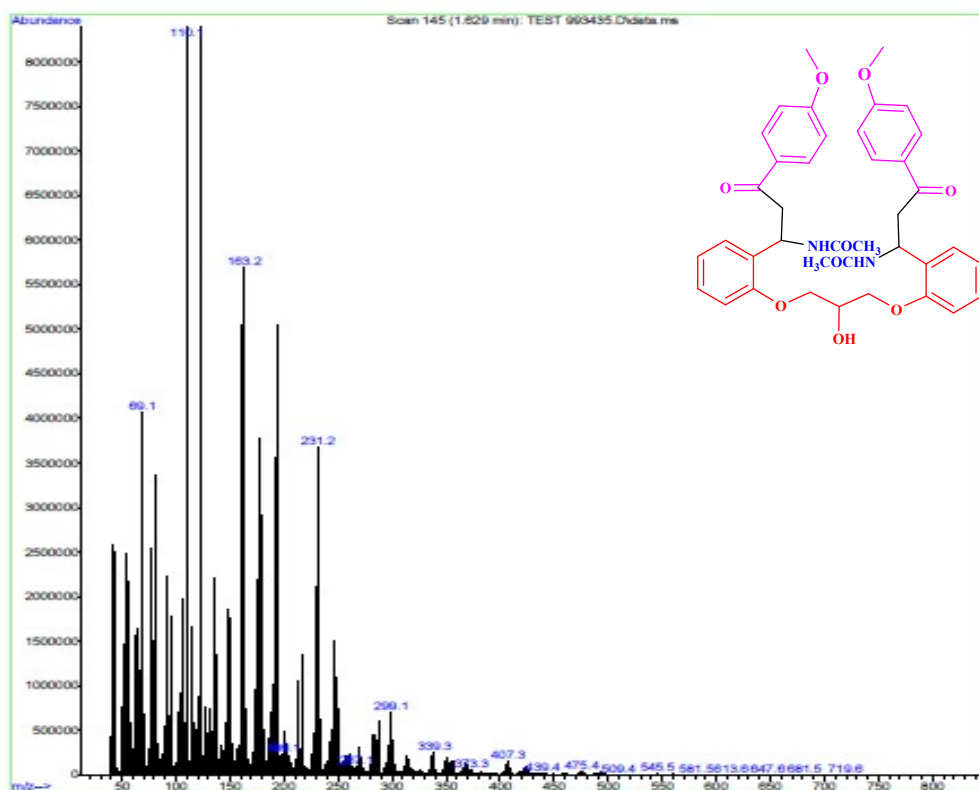

## References:

- [1] W-C. Gao, F. Hu, Y-M. Huo, H-H. Chang, X. Li, W-L. Wei, *Org. Lett.*, 2015, **17**, 15, 3914–3917
- [2] V. D. Sarca, K. K. Laali, *Green Chem.*, 2004, **6**, 245-248
- [3] K. M. Deshmukh, Z. S. Qureshi, N. S. Nandurkar, and B.M. Bhanage, *Can. J. Chem.*, 2008, **87**, 401-405.
- [4] B. Chen, J-t. Li, G. Chen, Y-l. Song, *Lett. Org. Chem.*, 2012, **9**, 45-50.
